# Supplementary material
Source: PubMed Central journal article supplement (PMC4250173)
Supplement: pnas.1419737111.sd01.pdf [file pnas.1419737111.sd01.pdf]

**Arrangement of ncAA library for Figure 1, S1, and S2\***

|   |    |    |    |    |    |    |    |    |    |     |     |     |   |
|---|----|----|----|----|----|----|----|----|----|-----|-----|-----|---|
|   | 1  | 2  | 3  | 4  | 5  | 6  | 7  | 8  | 9  | 10  | 11  | 12  |   |
| H | H1 | H2 | H3 | H4 | H5 | H6 | H7 | H8 | H9 | H10 | H11 | H12 | H |
| G | G1 | G2 | G3 | G4 | G5 | G6 | G7 | G8 | G9 | G10 | G11 | G12 | G |
| F | F1 | F2 | F3 | F4 | F5 | F6 | F7 | F8 | F9 | F10 | F11 | F12 | F |
| E | E1 | E2 | E3 | E4 | E5 | E6 | E7 | E8 | E9 | E10 | E11 | E12 | E |
| D | D1 | D2 | D3 | D4 | D5 | D6 | D7 | D8 | D9 | D10 | D11 | D12 | D |
| C | C1 | C2 | C3 | C4 | C5 | C6 | C7 | C8 | C9 | C10 | C11 | C12 | C |
| B | B1 | B2 | B3 | B4 | B5 | B6 | B7 | B8 | B9 | B10 | B11 | B12 | B |
| A | A1 | A2 | A3 | A4 | A5 | A6 | A7 | A8 | A9 | A10 | A11 | A12 | A |
|   | 1  | 2  | 3  | 4  | 5  | 6  | 7  | 8  | 9  | 10  | 11  | 12  |   |

\*The wells labeled in red color were set as control experiments with water. Codes in each well represent the different ncAAs in the library (see below).

**GFP fluorescence measurements for the data shown in Figure 1 (AcKRS3)\***

|   |              |        |   |   |             |            |   |   |            |    |    |            |   |
|---|--------------|--------|---|---|-------------|------------|---|---|------------|----|----|------------|---|
|   | 1            | 2      | 3 | 4 | 5           | 6          | 7 | 8 | 9          | 10 | 11 | 12         |   |
| H | 0            | 0      | 0 | 0 | 0           | 0          | 0 | 0 | 2<br>(0.1) | 0  | 0  | 0          | H |
| G | 0            | 0      | 0 | 0 | 0           | 0          | 0 | 0 | 0          | 0  | 0  | 0          | G |
| F | 0            | 0      | 0 | 0 | 0           | 0          | 0 | 0 | 0          | 0  | 0  | 0          | F |
| E | 0            | 0      | 0 | 0 | 0           | 3<br>(0.5) | 0 | 0 | 0          | 0  | 0  | 0          | E |
| D | 0            | 0      | 0 | 0 | 0           | 0          | 0 | 0 | 1<br>(0.1) | 0  | 0  | 0          | D |
| C | 0            | 0      | 0 | 0 | 0           | 0          | 0 | 0 | 0          | 0  | 0  | 0          | C |
| B | 0            | 0      | 0 | 0 | 19<br>(2.0) | 0          | 0 | 0 | 0          | 0  | 0  | 3<br>(0.2) | B |
| A | 100<br>(6.0) | 3(0.3) | 0 | 0 | 0           | 0          | 0 | 0 | 0          | 0  | 0  | 0          | A |
|   | 1            | 2      | 3 | 4 | 5           | 6          | 7 | 8 | 9          | 10 | 11 | 12         |   |

\*The wells labeled in red color were set as control experiments with water. Codes in each well represent the different ncAAs in the library (see below). Standard deviations for each above background measurement are given in parentheses.

**GFP fluorescence measurements for the data shown in Figure S1 (AcKRS1)\***

|   | 1            | 2          | 3 | 4 | 5           | 6          | 7 | 8 | 9          | 10      | 11 | 12 |   |
|---|--------------|------------|---|---|-------------|------------|---|---|------------|---------|----|----|---|
| H | 0            | 0          | 0 | 0 | 0           | 0          | 0 | 0 | 4<br>(0.2) | 0       | 0  | 0  | H |
| G | 0            | 0          | 0 | 0 | 0           | 0          | 0 | 0 | 0          | 0       | 0  | 0  | G |
| F | 0            | 0          | 0 | 0 | 0           | 0          | 0 | 0 | 0          | 0       | 0  | 0  | F |
| E | 0            | 0          | 0 | 0 | 0           | 5<br>(0.1) | 0 | 0 | 0          | 0       | 0  | 0  | E |
| D | 0            | 0          | 0 | 0 | 0           | 0          | 0 | 0 | 1<br>(0.1) | 5 (0.4) | 0  | 0  | D |
| C | 0            | 0          | 0 | 0 | 0           | 0          | 0 | 0 | 0          | 0       | 0  | 0  | C |
| B | 0            | 0          | 0 | 0 | 21<br>(2.1) | 0          | 0 | 0 | 0          | 0       | 0  | 0  | B |
| A | 100<br>(5.0) | 6<br>(0.3) | 0 | 0 | 0           | 0          | 0 | 0 | 0          | 0       | 0  | 0  | A |
|   | 1            | 2          | 3 | 4 | 5           | 6          | 7 | 8 | 9          | 10      | 11 | 12 |   |

\*The wells labeled in red color were set as control experiments with water. Codes in each well represent the different ncAAs in the library (see below). Standard deviations for each above background measurement are given in parentheses.

**GFP fluorescence measurements for the data shown in Figure S2 (IFRS)\***

|   | 1            | 2           | 3           | 4          | 5           | 6           | 7          | 8           | 9          | 10 | 11          | 12 |   |
|---|--------------|-------------|-------------|------------|-------------|-------------|------------|-------------|------------|----|-------------|----|---|
| H | 0            | 1<br>(0.2)  | 12<br>(1.0) | 0          | 0           | 0           | 0          | 0           | 0          | 0  | 0           | 0  | H |
| G | 0            | 0           | 8<br>(0.6)  | 1<br>(0.2) | 0           | 0           | 1<br>(0.2) | 0           | 0          | 0  | 0           | 0  | G |
| F | 0            | 0           | 1<br>(0.1)  | 0          | 0           | 9<br>(0.5)  | 0          | 0           | 0          | 0  | 46<br>(3.2) | 0  | F |
| E | 0            | 0           | 0           | 0          | 0           | 68<br>(5.2) | 2<br>(0.4) | 0           | 0          | 0  | 0           | 0  | E |
| D | 0            | 9<br>(1.0)  | 1<br>(0.1)  | 0          | 0           | 0           | 0          | 0           | 7<br>(0.9) | 0  | 0           | 0  | D |
| C | 0            | 0           | 0           | 0          | 0           | 0           | 0          | 0           | 0          | 0  | 0           | 0  | C |
| B | 0            | 0           | 0           | 0          | 48<br>(0.9) | 0           | 0          | 0           | 0          | 0  | 0           | 0  | B |
| A | 100<br>(5.9) | 53<br>(2.3) | 0           | 0          | 0           | 0           | 0          | 30<br>(0.5) | 0          | 0  | 0           | 0  | A |
|   | 1            | 2           | 3           | 4          | 5           | 6           | 7          | 8           | 9          | 10 | 11          | 12 |   |

\*The wells labeled in red color were set as control experiments with water. Codes in each well represent the different ncAAs in the library (see below). Standard deviations for each above background measurement are given in parentheses.

**List of ncAAs used in this study for Figure 2, S1, and S2**

| Position | Name    | NAA Name                                                                                           | IUPAC Name                                                                           | CAS Number  | Chemical Structure |
|----------|---------|----------------------------------------------------------------------------------------------------|--------------------------------------------------------------------------------------|-------------|--------------------|
| A1       | Control | -                                                                                                  | -                                                                                    | -           | -                  |
| B1       | Pyl     | <i>N</i> <sup>ε</sup> -(pyrrolyl)-L-lysine                                                         | <i>N</i> 6-[[ <i>(2R,3R)</i> -3-methyl-3,4-dihydro-2H-pyrrol-2-yl]carbonyl]-L-lysine | 448235-52-7 |                    |
| C1       | mK      | <i>N</i> <sup>ε</sup> -Methyl-L-lysine hydrochloride                                               | ( <i>S</i> )-2-Amino-6-(methylamino)hexanoic acid hydrochloride                      | 7622-29-9   |                    |
| D1       | 2mK     | <i>N</i> <sup>ε</sup> , <i>N</i> <sup>ε</sup> -Dimethyl-L-lysine hydrochloride                     | ( <i>S</i> )-2-Amino-6-(dimethylamino)hexanoic acid hydrochloride                    | 2259-86-1   |                    |
| E1       | 3mK     | <i>N</i> <sup>ε</sup> , <i>N</i> <sup>ε</sup> , <i>N</i> <sup>ε</sup> -Trimethyl-L-lysine chloride | ( <i>S</i> )-2-Amino-6-(trimethylamino)hexanoic acid chloride                        | 55528-53-5  |                    |
| F1       | CbzK    | <i>N</i> <sup>ε</sup> -Carbobenzoxy-L-lysine                                                       | ( <i>S</i> )-2-Amino-6-(phenylmethoxycarbonylamino)hexanoic acid                     | 1155-64-2   |                    |
| G1       | NicoK   | <i>N</i> <sup>ε</sup> -Nicotinyll-L-lysine                                                         | ( <i>S</i> )-2-Amino-6-(nicotinylamino)hexanoic acid                                 | 158276-23-4 |                    |

|    |       |                                                     |                                                                |             |  |
|----|-------|-----------------------------------------------------|----------------------------------------------------------------|-------------|--|
| H1 | AlocK | <i>N</i> <sup>ε</sup> - Allyloxycarbonyl - L-lysine | ( <i>S</i> )-2-Amino-6-(allyloxycarbonyl amino)hexanoic acid   | 6298-03-9   |  |
| A2 | 3CF3F | 3-Trifluoromethyl- L-phenylalanine                  | ( <i>S</i> )-2-amino-3-(3-trifluoromethylphenyl)propanoic acid | 14464-68-7  |  |
| B2 | 2BrF  | L-2-Bromo phenylalanine                             | ( <i>S</i> )-2-amino-3-(2-bromophenyl)propanoic acid           | 42538-40-9  |  |
| C2 | 2IF   | L-2-Iodo phenylalanine                              | ( <i>S</i> )-2-amino-3-(2-iodophenyl)propanoic acid            | 167817-55-2 |  |
| D2 | 2MeF  | L-2-Methyl phenylalanine                            | ( <i>S</i> )-2-amino-3-(2-methylphenyl)propanoic acid          | 80126-53-0  |  |
| E2 | 2CF3F | L-2-Trifluoromethyl phenylalanine                   | ( <i>S</i> )-2-amino-3-(2-trifluoromethylphenyl)propanoic acid | 119009-47-1 |  |
| F2 | Cit   | L-Citrulline                                        | ( <i>S</i> )-2-amino-5-ureidopentanoic acid                    | 372-75-8    |  |
| G2 | Orn   | L-Ornithine                                         | ( <i>S</i> )-2,5-diaminopentanoic acid                         | 70-26-8     |  |

|    |         |                                 |                                                                  |            |  |
|----|---------|---------------------------------|------------------------------------------------------------------|------------|--|
| H2 | 2CBF    | L-2-Carbamoyl phenylalanine     | (S)-2-amino-3-(2-carbamoyl phenyl)propanoic acid                 | -          |  |
| A3 | AcmC    | S-(acetamidomethyl)-L-cysteine  | 3-(acetamidomethylsulfanyl)-2-aminopropanoic acid                | 19647-70-2 |  |
| B3 | 34MeF   | L-3,4-Dimethoxyl phenylalanine  | (S)-2-amino-3-(3,4-dimethoxyphenyl)propanoic acid                | 32161-30-1 |  |
| C3 | 24NiF   | L-2,4-Dinitro phenylalanine     | (S)-2-amino-3-(2,4-dinitrophenyl) propanoic acid                 | 49607-21-8 |  |
| D3 | ZY      | O-Carbobenzoxy-L-tyrosine       | (S)-2-amino-3-(4-(((benzyloxy)carbonyl)oxy)phenyl)propanoic acid | 21106-04-7 |  |
| E3 | 35BrY   | L-3,5-Dibromo tyrosine          | (S)-2-amino-3-(3,5-dibromo-4-hydroxyphenyl)propanoic acid        | 300-38-9   |  |
| F3 | 26ClBzY | O-2,6-Dichlorobenzyl-L-tyrosine | (S)-2-amino-3-(4-((2,6-dichlorobenzyl)oxy)phenyl)propanoic acid  | 40298-69-9 |  |

|    |        |                                                     |                                                             |             |                                                                                       |
|----|--------|-----------------------------------------------------|-------------------------------------------------------------|-------------|---------------------------------------------------------------------------------------|
| G3 | FOH    | L-β-Phenyllactic acid                               | (S)-2-hydroxy-3-phenylpropanoic acid                        | 20312-36-1  | 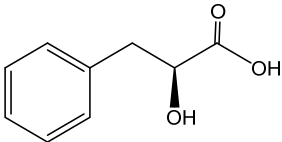   |
| H3 | 26FF   | L-2,6-Difluoro phenylalanine                        | (S)-2-amino-3-(2,6-difluorophenyl)propanoic acid            | 33787-05-2  |    |
| A4 | BzS    | O-Benzyl-L-serine                                   | (2R)-2-amino-3-phenylmethoxypropanoic acid                  | 4726-96-9   |    |
| B4 | PhtOrn | N <sup>δ</sup> -Phthaloyl-L-ornithine hydrochloride | (S)-2-amino-5-(isoindolin-2-yl)pentanoic acid hydrochloride | -           |    |
| C4 | AlStA  | 3-Styryl-L-alanine                                  | (S,E)-2-amino-5-phenylpent-4-enoic acid                     | 267650-37-3 |    |
| D4 | BzC    | S-benzyl-L-cysteine                                 | (2R)-2-amino-3-benzylsulfanylpropanoic acid                 | 3054-01-1   |   |
| E4 | ONBC   | S-(2-nitrobenzyl)-L-cysteine                        | (2R)-2-amino-3-(2-nitrobenzyl)sulfanylpropanoic acid        | -           |  |



|    |       |                                                                |                                                                             |            |  |
|----|-------|----------------------------------------------------------------|-----------------------------------------------------------------------------|------------|--|
| F4 | BocK  | <i>N</i> <sup>ε</sup> -( <i>tert</i> -butoxycarbonyl)-L-lysine | ( <i>S</i> )-2-Amino-6-( <i>tert</i> -butoxycarbonylamino)hexanoic acid     | 2418-95-3  |  |
| G4 | ForW  | <i>N</i> <sup>α</sup> -Formyl-L-tryptophan hydrochloride       | ( <i>S</i> )-2-Amino-3-(1-formyl-1H-indol-3-yl)propanoic acid hydrochloride | 38023-86-8 |  |
| H4 | 5BrW  | 5-Bromo-L-tryptophan                                           | ( <i>S</i> )-2-Amino-3-(5-bromo-1H-indol-3-yl)propanoic acid                | 25197-99-3 |  |
| A5 | 2ClZK | <i>N</i> <sup>ε</sup> -2-Chloro-carbobenzoxy-L-lysine          | ( <i>S</i> )-2-Amino-6-(2-chlorobenzylamino)hexanoic acid                   | 42390-97-6 |  |
| B5 | 3IF   | 3-Iodo-L-phenylalanine                                         | ( <i>S</i> )-2-amino-3-(3-iodophenyl)propanoic acid                         | 20846-39-3 |  |
| C5 | ForK  | <i>N</i> <sup>ε</sup> -Formyl-L-lysine                         | ( <i>S</i> )-2-Amino-6-(formylamino)hexanoic acid                           | 1190-48-3  |  |
| D5 | 4NO2K | <i>N</i> <sup>ε</sup> -4-Nitro-carbobenzoxy-L-lysine           | ( <i>S</i> )-2-Amino-6-(4-nitro-carbobenzoxyamino)hexanoic acid             | 3557-90-2  |  |

|    |            |                                                                  |                                                                                                                                                                 |             |  |
|----|------------|------------------------------------------------------------------|-----------------------------------------------------------------------------------------------------------------------------------------------------------------|-------------|--|
| E5 | 5OHK       | 5-Hydroxylysine                                                  | (2 <i>S</i> ,5 <i>R</i> )-2,6-diamino-5-hydroxyhexanoic acid                                                                                                    | 30528-11-1  |  |
| F5 | BioK       | <i>N</i> <sup>ε</sup> -Biotinyl-L-lysine                         | ( <i>S</i> )-2-Amino-6-(5-((3 <i>aS</i> ,4 <i>S</i> ,6 <i>aR</i> )-2-oxohexahydro-1 <i>H</i> -thieno[3,4- <i>d</i> ]imidazol-4-yl)pentanoyl amino)hexanoic acid | 576-19-2    |  |
| G5 | AcNH2<br>K | DL-2-Acetylamino-6-N-Boc-amino-4-hexynoic acid·DCHA              | 2-acetamido-6-((tert-butoxycarbonyl)amino)hex-4-ynoic acid·DCHA                                                                                                 | 90102-79-7  |  |
| H5 | TosK       | <i>N</i> <sup>ε</sup> - <i>p</i> -Tosyl-L-lysine                 | ( <i>S</i> )-2-Amino-6-(4-tosylamino)hexanoic acid                                                                                                              | 2130-76-9   |  |
| A6 | 6BrW       | 6-Bromo-DL-tryptophan                                            | 2-Amino-3-(6-bromo-1 <i>H</i> -indol-3-yl)propanoic acid                                                                                                        | 33599-61-0  |  |
| B6 | BocW       | <i>N</i> <sup>ε</sup> - <i>tert</i> -Butoxycarbonyl-L-tryptophan | ( <i>S</i> )-2-Amino-3-(1- <i>tert</i> -butoxycarbonyl-1 <i>H</i> -indol-3-yl)propanoic acid                                                                    | 146645-63-8 |  |
| C6 | 5FW        | 5-Fluoro-DL-tryptophan                                           | 2-Amino-3-(5-fluoro-1 <i>H</i> -indol-3-yl)propanoic acid                                                                                                       | 154-08-5    |  |

|    |            |                                  |                                                       |             |                                                                                       |
|----|------------|----------------------------------|-------------------------------------------------------|-------------|---------------------------------------------------------------------------------------|
| D6 | 3CNF       | 3-Cyano- L-phenylalanine         | (S)-2-amino-3-(3-cyanophenyl)propanoic acid           | 57213-48-6  | 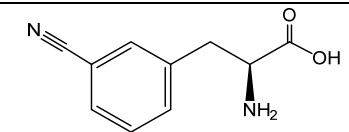   |
| E6 | 3BrF       | L-3-Bromo phenylalanine          | (S)-2-amino-3-(3-bromophenyl)propanoic acid           | 82311-69-1  |    |
| F6 | 3NO2F      | 3-Nitro- L-phenylalanine         | (S)-2-amino-3-(3-nitrophenyl)propanoic acid           | 19883-74-0  |    |
| G6 | 4ClF       | 4-Chloro-L-phenylalanine         | (S)-2-Amino-3-(4-chlorophenyl)propanoic acid          | 14173-39-8  |    |
| H6 | 4BrF       | 4-Bromo-L-phenylalanine          | (S)-2-Amino-3-(4-bromophenyl)propanoic acid           | 24250-84-8  |    |
| A7 | b2BrF      | L-2-Bromo-β-phenylalanine        | (S)-3-amino-3-(2-bromophenyl)propanoic acid           | 275826-34-1 |    |
| B7 | aMeF       | α-Methyl-L-phenylalanine         | (S)-2-amino-2-methyl-3-phenylpropanoic acid           | 23239-35-2  |   |
| C7 | aMe4F<br>F | α-Methyl-L-4-fluorophenylalanine | (S)-2-amino-3-(4-fluorophenyl)-2-methylpropanoic acid | 130855-57-1 |  |

|    |       |                                  |                                                       |             |                                                                                       |
|----|-------|----------------------------------|-------------------------------------------------------|-------------|---------------------------------------------------------------------------------------|
| D7 | CaMeC | S-(Carboxymethyl)-L-cysteine     | (2S)-2-Amino-3-(carboxymethylsulfanyl)propanoic acid  | 50698-76-5  | 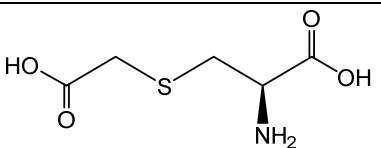   |
| E7 | 4FF   | L-4-Fluorophenylalanine          | (S)-2-amino-3-(4-fluorophenyl)propanoic acid          | 1132-68-9   |    |
| F7 | HOaF  | $\alpha$ -Phenyllactic acid      | 2-hydroxy-2-methyl-3-phenylpropanoic acid             | 515-30-0    |    |
| G7 | 2FF   | L-2-Fluorophenylalanine          | (S)-2-amino-3-(2-fluorophenyl)propanoic acid          | 19883-78-4  |    |
| H7 | 24ClF | L-2,4-Dichlorophenylalanine      | (S)-2-amino-3-(2,4-dichlorophenyl)propanoic acid      | 111119-36-9 |    |
| A8 | 3MeF  | 3-Methyl-L-phenylalanine         | (S)-2-amino-3-(3-methylphenyl)propanoic acid          | 114926-37-3 |   |
| B8 | 2NapA | 3-(2-Naphthyl)-L-alanine         | (S)-2-Amino-3-(naphthalen-2-yl)propanoic acid         | 58438-03-2  |  |
| C8 | 4CF3F | L-4-Trifluoromethylphenylalanine | (S)-2-amino-3-(4-trifluoromethylphenyl)propanoic acid | 114926-38-4 |  |

|    |       |                           |                                                             |            |                                                                                       |
|----|-------|---------------------------|-------------------------------------------------------------|------------|---------------------------------------------------------------------------------------|
| D8 | AmEtC | S-(Aminoethyl)-L-cysteine | (S)-2-Amino-3-(2-aminoethylsulfanyl)propionic acid          | 2936-69-8  | 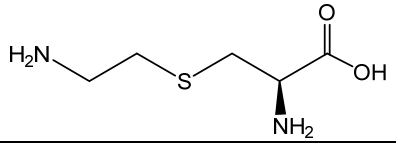   |
| E8 | 6FW   | 6-Fluoro-DL-tryptophan    | 2-Amino-3-(6-fluoro-1H-indol-3-yl)propanoic acid            | 7730-20-3  |    |
| F8 | 7AzW  | L-7-Azatryptophan         | (S)-2-Amino-3-(1H-pyrrolo[2,3-b]pyridin-3-yl)propanoic acid | 1137-00-4  |    |
| G8 | 7MeW  | 7-Methyl-DL-tryptophan    | 2-Amino-3-(7-methyl-1H-indol-3-yl)propanoic acid            | 17332-70-6 |    |
| H8 | 5MeW  | 5-Methyl-L-tryptophan     | (S)-2-Amino-3-(5-methyl-1H-indol-3-yl)propanoic acid        | 154-06-3   |   |
| A9 | AmAdP | L-2-Amino adipic acid     | (S)-2-amino hexanedioic acid                                | 1118-90-7  |  |

|     |         |                                                        |                                                                                                     |             |                                                                                       |
|-----|---------|--------------------------------------------------------|-----------------------------------------------------------------------------------------------------|-------------|---------------------------------------------------------------------------------------|
| B9  | FmocK   | <i>N</i> <sup>ε</sup> -(Fmoc)-L-lysine                 | ( <i>S</i> )-2-Amino-6-(9H-fluoren-9-yl)methoxy carbonylamino)hexanoic acid                         | 84624-28-2  | 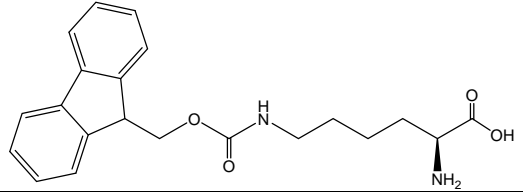   |
| C9  | HomoR   | L-Homoarginine                                         | ( <i>S</i> )-2-Amino-6-(carbamimidoyl amino)hexanoic acid                                           | 156-86-5    |    |
| D9  | BrThiA  | L-2-(5-Bromothieryl)alanine                            | ( <i>S</i> )-2-amino-3-(2-bromothiophen-3-yl)propanoic acid                                         | 154593-58-5 |    |
| E9  | HomoCit | L-Homocitrulline                                       | ( <i>S</i> )-2-Amino-6-(carbamoylamino)hexanoic acid                                                | 1190-49-4   |    |
| F9  | MeR     | <i>N</i> <sup>ω</sup> -methyl-L-arginine hydrochloride | (2 <i>S</i> )-2-amino-5-[( <i>N</i> <sup>1</sup> -methylcarbamimidoyl)amino]pentanoic hydrochloride | 156706-47-7 |    |
| G9  | AcK     | <i>N</i> <sup>ε</sup> -Acetyl-L-lysine                 | ( <i>S</i> )-2-Amino-6-(acetylamino)hexanoic acid                                                   | 692-04-6    |    |
| H9  | TosR    | <i>N</i> <sup>ω</sup> - <i>p</i> -Tosyl-L-arginine     | (2 <i>S</i> )-2-amino-5-[[amino-[(4-methylphenyl)sulfonylamino]methylidene]amino]pentanoic acid     | 4353-32-6   |   |
| A10 | 4IF     | L-4-Iodo phenylalanine                                 | ( <i>S</i> )-2-amino-3-(4-iodophenyl)propanoic acid                                                 | 24250-85-9  |  |

|     |       |                              |                                                    |             |                                                                                       |
|-----|-------|------------------------------|----------------------------------------------------|-------------|---------------------------------------------------------------------------------------|
| B10 | 4MeF  | L-4-Methyl phenylalanine     | (S)-2-amino-3-(4-methylphenyl)propanoic acid       | 1991-87-3   | 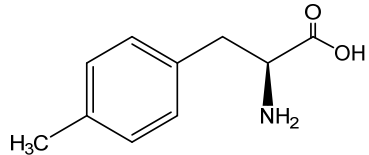   |
| C10 | oMeY  | L-4-Methoxy phenylalanine    | (S)-2-amino-3-(4-methoxyphenyl)propanoic acid      | 6230-11-1   |    |
| D10 | 3MeOF | 3-Methoxy-L-phenylalanine    | (S)-2-amino-3-(3-methoxyphenyl)propanoic acid      | 33879-32-2  |    |
| E10 | 4NO2F | L-4-Nitro phenylalanine      | (S)-2-amino-3-(4-nitrophenyl)propanoic acid        | 949-99-5    |    |
| F10 | 4NH2F | L-4-Amino phenylalanine      | (S)-2-amino-3-(4-aminophenyl)propanoic acid        | 2410-24-4   |    |
| G10 | 4tBuF | L-4-tert-butyl phenylalanine | (S)-2-amino-3-(4-(tert-butyl)phenyl)propanoic acid | 82372-74-5  |   |
| H10 | 4BzoF | L-4-benzoyl phenylalanine    | (S)-2-amino-3-(4-benzoylphenyl)propanoic acid      | 104504-45-2 |  |
| A11 | 4MeW  | 4-Methyl-DL-tryptophan       | 2-Amino-3-(4-methyl-1H-indol-3-yl)propanoic acid   | 1954-45-6   |  |

|     |             |                                                   |                                                                    |             |                                                                                       |
|-----|-------------|---------------------------------------------------|--------------------------------------------------------------------|-------------|---------------------------------------------------------------------------------------|
| B11 | 5MeO<br>W   | 5-Methoxy-L-tryptophan                            | (S)-2-amino-3-(5-methoxy-1H-indol-3-yl)propanoic acid              | 4350-09-8   | 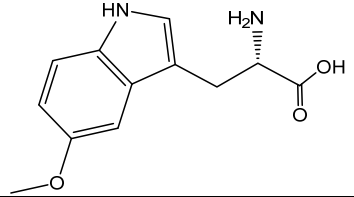   |
| C11 | 5OHW        | 5-hydroxy-L-tryptophan                            | (S)-2-amino-3-(5-hydroxy-1H-indol-3-yl)propanoic acid              | 4350-09-8   |    |
| D11 | HOW         | DL-Indole-3-lactic acid                           | 2-hydroxy-3-(1H-indol-3-yl)propanoic acid                          | 1821-52-9   |    |
| E11 | 5MeW        | 5-Methyl-L-tryptophan                             | (S)-2-amino-3-(5-methyl-1H-indol-3-yl)propanoic acid               | 154-06-3    |    |
| F11 | 3ClF        | L-3-Chloro phenylalanine                          | (S)-2-amino-3-(3-chlorophenyl)propanoic acid                       | 80126-51-8  |   |
| G11 | 7BrW        | 7-Bromo-DL-tryptophan                             | 2-Amino-3-(7-bromo-1H-indol-3-yl)propanoic acid                    | 852391-45-8 |  |
| H11 | AmCa<br>EtK | N <sup>ε</sup> -(2-amino-2-carboxyethyl)-L-lysine | (2S)-2-Amino-6-[(2-amino-3-hydroxy-3-oxopropyl)amino]hexanoic acid | 18810-04-3  |  |
| A12 | Control     | -                                                 | -                                                                  | -           | -                                                                                     |



|     |          |                                                   |                                                                   |             |                                                                                       |
|-----|----------|---------------------------------------------------|-------------------------------------------------------------------|-------------|---------------------------------------------------------------------------------------|
| B12 | TfAcK    | <i>N</i> <sup>ε</sup> -(Trifluoroacetyl)-L-lysine | ( <i>S</i> )-2-Amino-6-(trifluoroacetylamino)hexanoic acid        | 10009-20-8  | 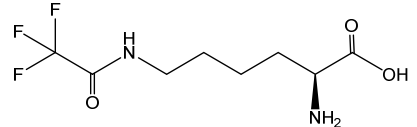   |
| C12 | dHONoR   | $\omega$ -Hydroxy-nor-L-arginine                  | ( <i>S</i> )-2-Amino-4-(2'-hydroxyguanidino)butyric acid          | 189302-40-7 |    |
| D12 | 35IY     | 3,5-Diiodo-L-tyrosine                             | ( <i>S</i> )-2-Amino-3-(4-hydroxy-3,5-diiodophenyl)propanoic acid | 300-39-0    |    |
| E12 | OZY      | <i>O</i> -Benzyl-L-tyrosine                       | ( <i>S</i> )-2-amino-3-(4-(benzyloxy)phenyl)propanoic acid        | 16652-64-5  |    |
| F12 | QuinolyA | 3-(2-Quinoyl)-L-alanine                           | ( <i>S</i> )-2-amino-3-(quinolin-2-yl)propanoic acid              | 161513-46-8 |    |
| G12 | 3NO2Y    | L-3-Nitrotyrosine                                 | ( <i>S</i> )-2-Amino-3-(4-hydroxy-3-nitrophenyl)propanoic acid    | 621-44-3    |   |
| H12 | 3IY      | L-3-Iodotyrosine                                  | ( <i>S</i> )-2-Amino-3-(4-hydroxy-3-iodophenyl)propanoic acid     | 2751-18-0   |  |
